# Supplementary material for: Combined Use of Tocilizumab and Mesenchymal Stem Cells Attenuate the Development of an Anti-HLA-A2.1 Antibody in a Highly Sensitized Mouse Model
Source: MDPI journal article supplement (doi:10.3390/ijms25031378), 2024-01-23
Supplement: s1 [file s1]

## TABLES

**Table S1.** Definition of experimental group

| Group | Name      | Description                                                                |
|-------|-----------|----------------------------------------------------------------------------|
| 1     | Syn-CONT  | B/6→B6 mouse x 2 times                                                     |
| 2     | Allo-CONT | HLA→B/6 x 2 times                                                          |
| 3     | BM-MS     | Allo+ hBM-MS 2x10 <sup>5</sup> /mice (every week)                          |
| 4     | TCZ       | Allo+TCZ 10mg/kg (x3/week)                                                 |
| 5     | TCZ+BM-MS | Allo+hBM-MS 2x10 <sup>5</sup> /mice (every week)<br>+TCZ 10mg/kg (x3/week) |

Abbreviation: HLA, Human Leukocyte Antigen;

**Table S2.** Fluorescence-activated cell sorting (FACS) markers

| B cell subset               | Surface marker             |
|-----------------------------|----------------------------|
| Pre-Pro B cell (BM)         | B220+CD21/CD35-IgM-        |
| Immature B cell (BM)        | B220+CD21/CD35-IgM+        |
| Mature B cell (BM)          | B220+ CD21/CD35+IgM+       |
| Long-lived Plasma cell (BM) | B220lowCD138+CD38low (Ig-) |
| Transitional B cell (SP)    | B220+CD21/CD35loIgM+       |
| Marginal B cell (SP)        | B220+ CD21/CD35hiIgM+      |
| Follicular B cell (SP)      | B220+ CD21/CD35+IgM+       |
| Memory B cell (SP)          | B220+CD138-CD38+IgM-IgD-   |

| <b>T cell subset</b> | <b>Surface marker</b>      |
|----------------------|----------------------------|
| Th1 (SP)             | B220+CD21/CD35-IgM-        |
| Th2 (SP)             | B220+CD21/CD35-IgM+        |
| Th17 (SP)            | B220+ CD21/CD35+IgM+       |
| Treg (SP)            | B220lowCD138+CD38low (Ig-) |

**Table S3.** Primer sequences used for qPCR

| <b>Genes</b>  | <b>Primer sequence(5'-3')Forward</b> | <b>Primer sequence(5'-3')Reverse</b> |
|---------------|--------------------------------------|--------------------------------------|
| IL-10         | 5'-CCAAGCCT-TATCGGAAATGA-3'          | 5'-TTTTCACAGGGGA-GAAATCG-3'          |
| IL-23         | 5'-CAGCAGCTCTCTCGGAATCTC-3'          | 5'-TGGATACGGGGCACATTATTTTT-3'        |
| IFN- $\gamma$ | 5'-TCAAGTGGCATAGATGTGGAAGAA-3'       | 5'-TGGCTCTTGCAGGATTTTCATG-3'         |
| Foxp3         | 5'- CAGCTGCCTACAGTGCCCCTAG-3'        | 5'-CATTTGCCAGCAGTGGGTAG-3'           |
